# Supplementary material for: Immunometabolic adaptation in monocytes underpins functional changes during pregnancy
Source: PubMed Central journal article supplement (PMC11088341; doi:10.1016/j.isci.2024.109779), 2024-04-18
Supplement: mmc1.pdf [file mmc1.pdf]

**iScience, Volume 27**

**Supplemental information**

**Immunometabolic adaptation in monocytes  
underpins functional changes during pregnancy**

**April Rees, Benjamin J. Jenkins, Roberto Angelini, Luke C. Davies, James G. Cronin, Nicholas Jones, and Catherine A. Thornton**

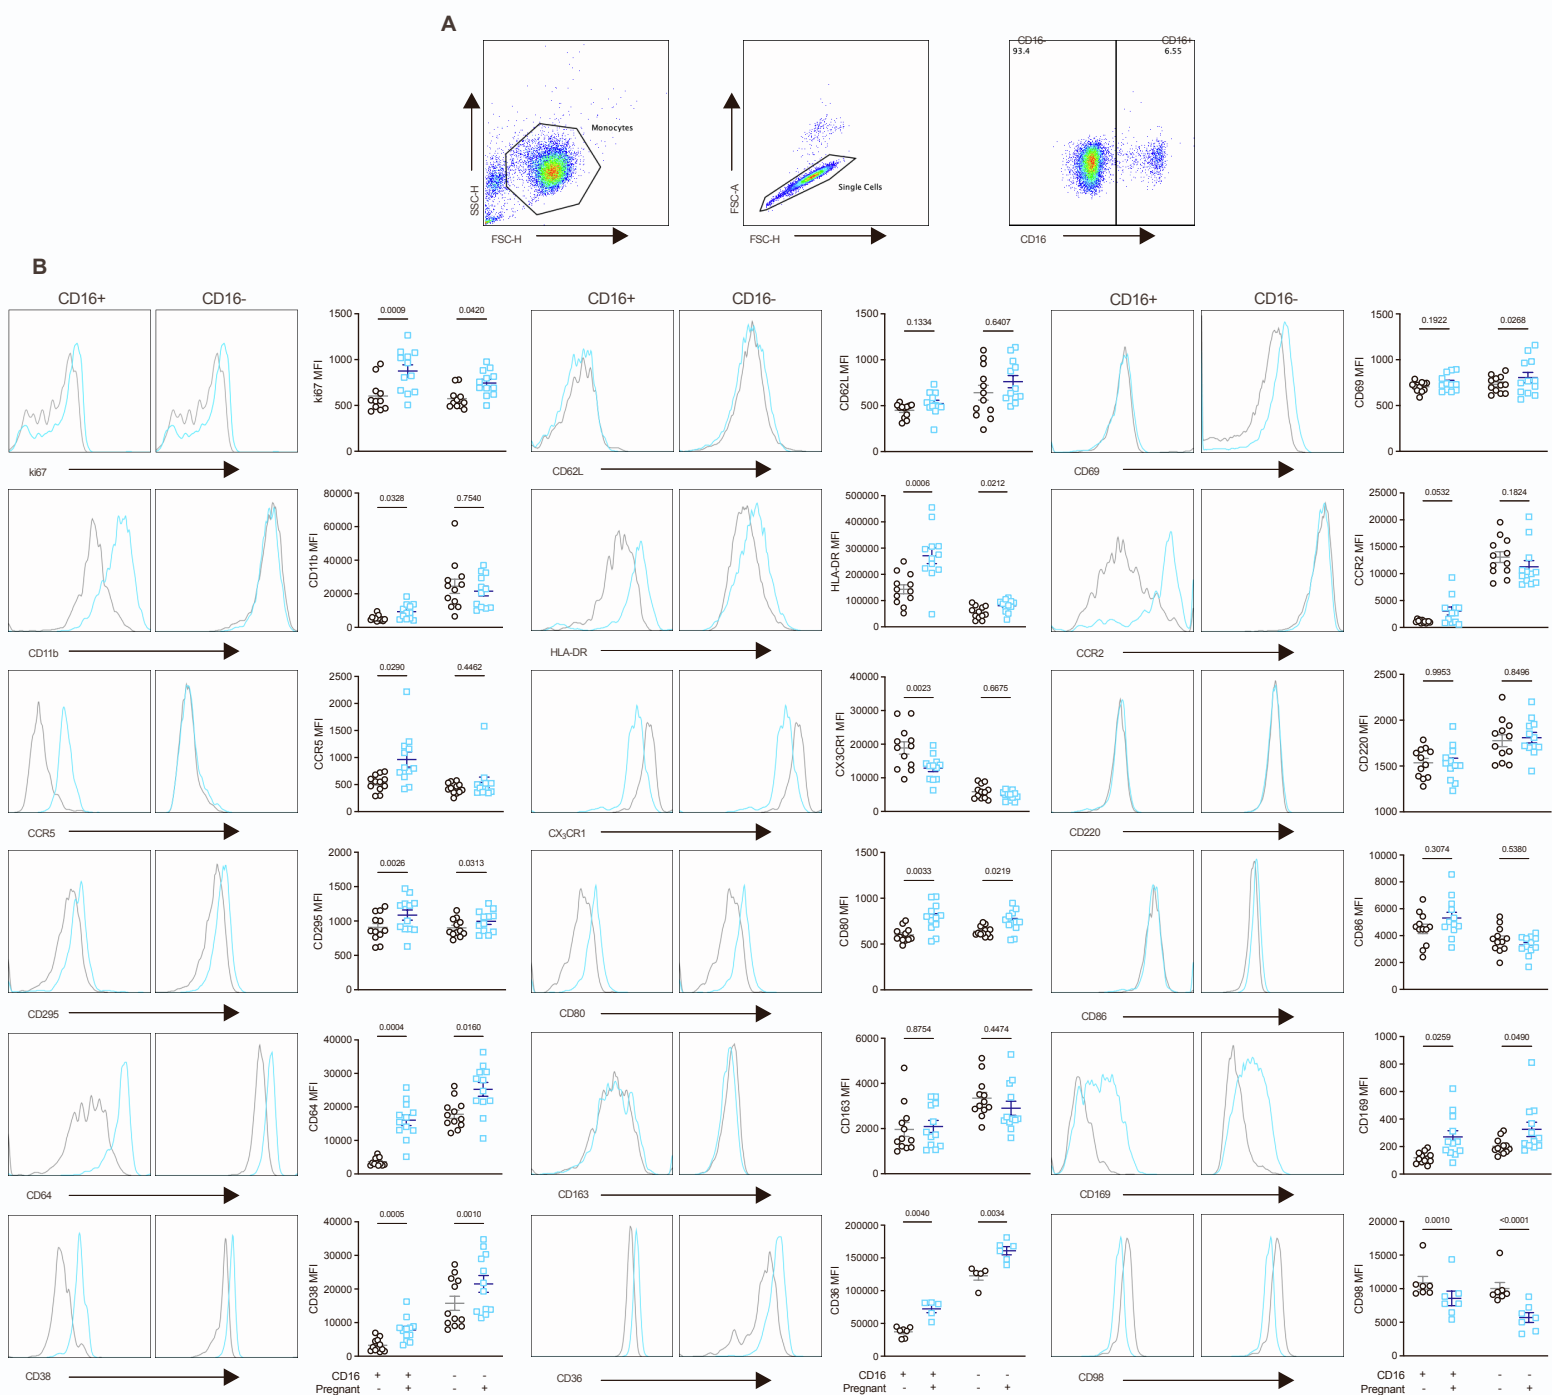

**Figure S1. Relating to Figure 1, representative dot plots and histograms for flow cytometry phenotyping.** (A) Dot plots illustrating the gating strategy for isolated monocytes to determine the phenotype of CD16+ and CD16- subsets. (B) Histograms and individual graphs for each expression marker analysed for CD16+ and CD16- subsets from non-pregnant (grey) and pregnant (blue) monocytes.

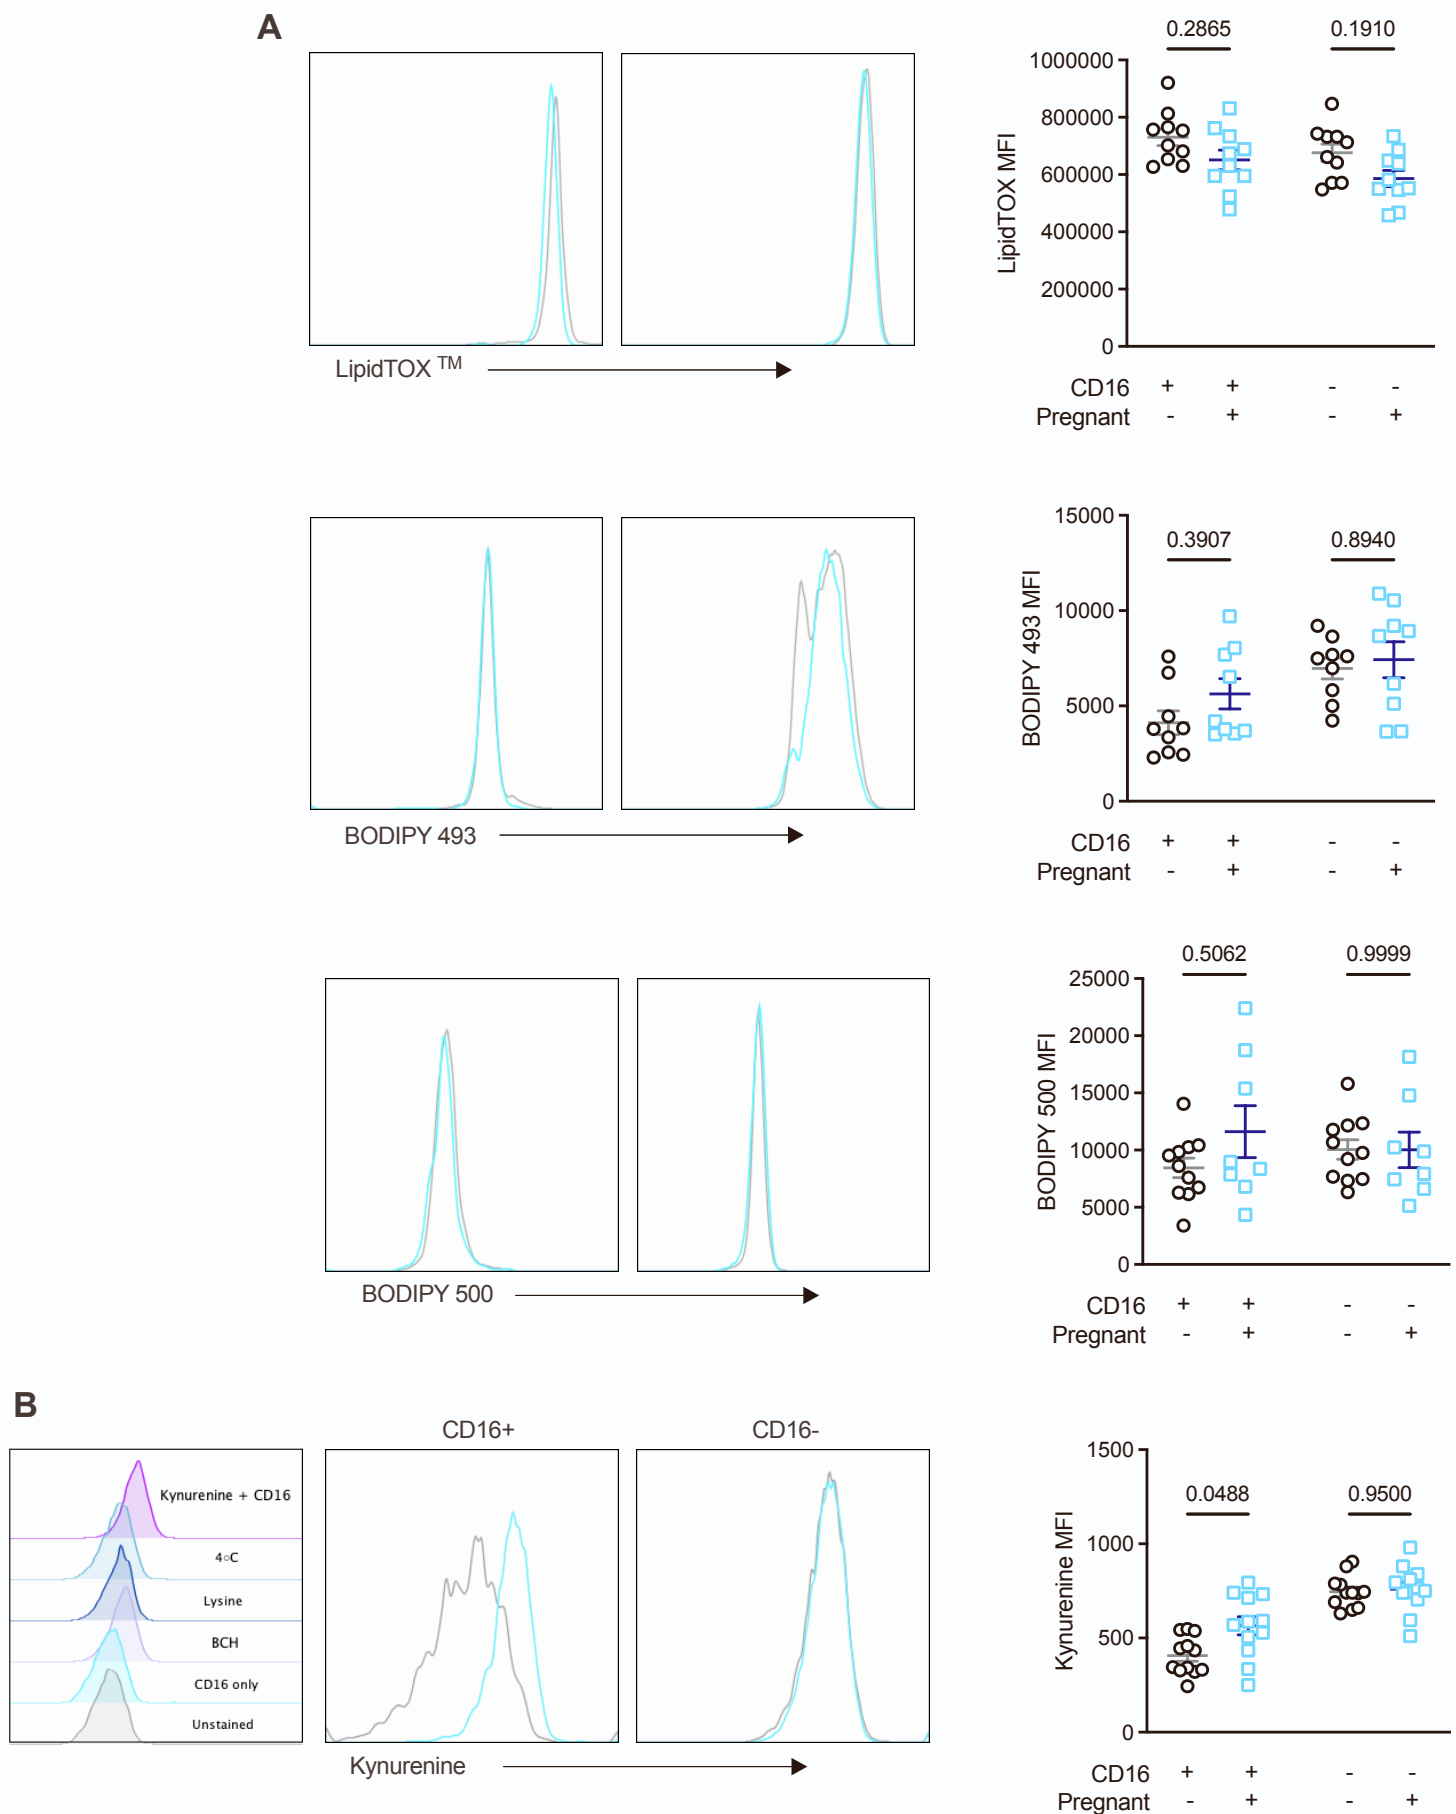

**Figure S2. Relating to Figure 1, Functional consequences of the changes in CD36 and CD98.** (A) Monocytes from non-pregnant (grey) and pregnant (blue) donors were subjected to LipidTOX™, BODIPY 493 (both storage), and BODIPY 500 (uptake), and analysed on the flow cytometer. (B) Representative histograms for the appropriate controls for analysis of kynurenine uptake. Monocytes were analysed for their ability to take kynurenine up from non-pregnant (grey) and pregnant (blue) donors.

MA plot - proteomics

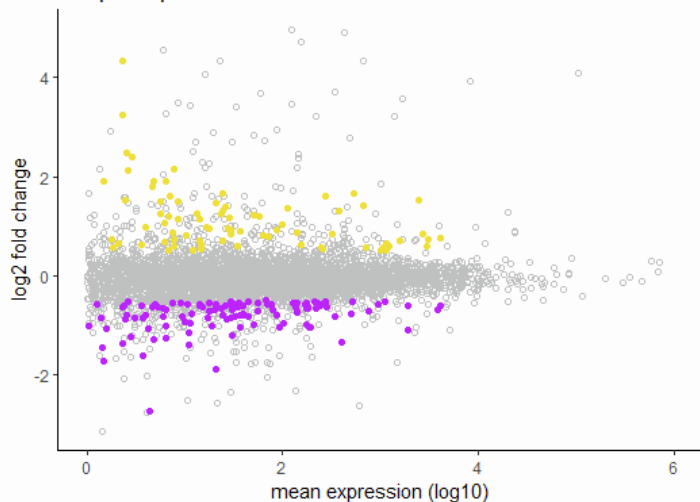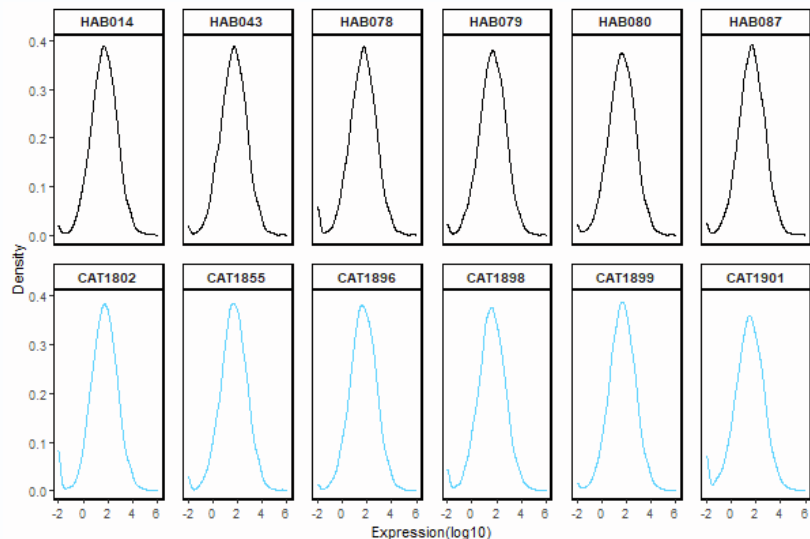

**Figure S3. Relating to Figure 1, QC checks for proteomics.** An MA plot for the proteomics data showing proteins which were found to be significantly up-regulated in pregnancy in gold, and down-regulated in purple. Distribution plots of the proteins found for each donor are also illustrated, highlighting the consistency between the groups.

**A**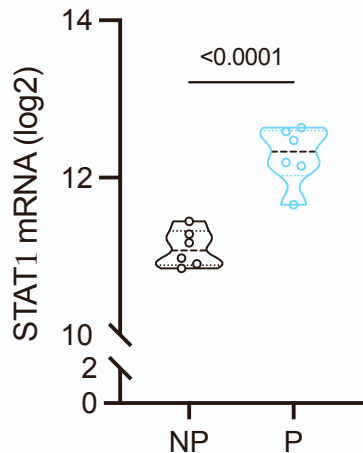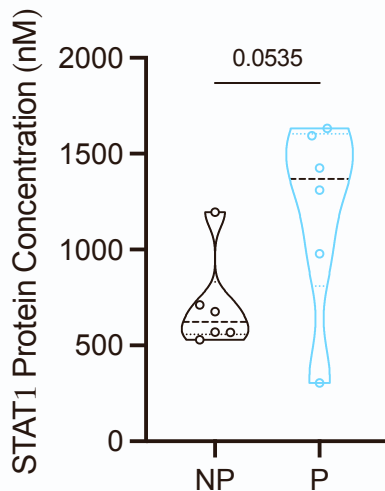**B**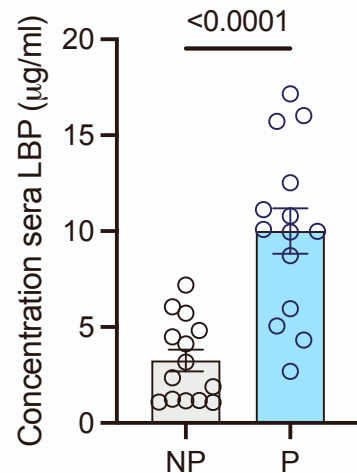

**Figure S4. Relating to Figure 1 and Figure 2, STAT1 mRNA and protein, and LBP levels in serum from non-pregnant and pregnant females.** (A) STAT1 mRNA data taken from the NanoString<sup>®</sup> Metabolism panel, and protein data taken from proteomics. (B) LBP levels in serum (n=14/group) were measured using an LBP-specific ELISA. Statistical analysis was performed using a Mann-Whitney test where  $p < 0.05$  was considered significant.

**Table S1, Relating to Figure 1.** Significantly up-regulated genes from the NanoString © Myeloid Innate Immunity panel.

| Gene ID  | Gene description                                            | Log2 fold change | p value |
|----------|-------------------------------------------------------------|------------------|---------|
| PSME2    | Proteasome activator complex subunit 2                      | 1.190            | 0.0070  |
| STAT1    | Signal transducer and activator of transcription 1          | 1.620            | 0.0070  |
| TNFSF10  | TNF Superfamily Member 10                                   | 1.600            | 0.0070  |
| IRF7     | Interferon regulatory factor 7                              | 1.160            | 0.0080  |
| FCGR3A   | Fc Gamma Receptor IIIa                                      | 1.270            | 0.0080  |
| VRK2     | Serine/threonine-protein kinase                             | 0.853            | 0.0094  |
| ISG15    | Ubiquitin Like Modifier                                     | 1.650            | 0.0100  |
| FBP1     | Fructose-Bisphosphatase 1                                   | 0.695            | 0.0106  |
| PSMB9    | Proteasome subunit beta type-9                              | 0.836            | 0.0106  |
| CBR1     | Carbonyl Reductase 1                                        | 0.534            | 0.0106  |
| TAP1     | Antigen Peptide Transporter 1                               | 1.240            | 0.0106  |
| TRAFD1   | TRAF-type zinc finger domain containing 1                   | 0.727            | 0.0108  |
| TGM2     | Transglutaminase 2                                          | 2.340            | 0.0108  |
| ARMC1    | Armadillo Repeat Containing 1                               | 0.647            | 0.0108  |
| C3AR1    | Complement C3a Receptor 1                                   | 0.933            | 0.0108  |
| SIGLEC1  | Sialic Acid Binding Ig Like Lectin 1                        | 2.730            | 0.0115  |
| IRF2     | Interferon Regulatory Factor 2                              | 0.758            | 0.0120  |
| GPR65    | G Protein-Coupled Receptor 65                               | 0.899            | 0.0120  |
| CCR2     | C-C Motif Chemokine Receptor 2 (MCP-1 receptor)             | 1.700            | 0.0133  |
| CD38     | Cyclic ADP ribose hydrolase                                 | 2.210            | 0.0138  |
| FPR2     | Formyl Peptide Receptor 2                                   | 1.790            | 0.0150  |
| TLR10    | Toll-like receptor 10                                       | 1.320            | 0.0200  |
| CTSL     | Cathepsin L                                                 | 1.520            | 0.0221  |
| FCGR1A   | Fc Gamma Receptor Ia                                        | 1.900            | 0.0221  |
| IFIT1    | Interferon-induced protein with tetratricopeptide repeats 1 | 2.560            | 0.0235  |
| TLR1     | Toll-like receptor 1                                        | 1.070            | 0.0254  |
| FADD     | Fas Associated Via Death Domain                             | 0.910            | 0.0259  |
| C1QB     | Complement C1q B Chain                                      | 2.310            | 0.0259  |
| RNASE3   | Ribonuclease 3                                              | 0.619            | 0.0259  |
| USP18    | Ubiquitin Specific Peptidase 18                             | 1.920            | 0.0260  |
| IRF1     | Interferon regulatory factor 1                              | 0.857            | 0.0277  |
| CASP10   | Cysteine-aspartic acid protease 10                          | 0.753            | 0.0281  |
| PSMB8    | Proteasome subunit beta type-8                              | 0.529            | 0.0296  |
| P2RX1    | Purinergic Receptor P2X 1                                   | 0.808            | 0.0325  |
| C1QC     | Complement C1q C Chain                                      | 2.630            | 0.0327  |
| TLR7     | Toll-like receptor 7                                        | 1.130            | 0.0333  |
| TNFRSF1A | Tumor necrosis factor receptor superfamily member 1A        | 0.585            | 0.0333  |
| IFNAR2   | Interferon Alpha and Beta Receptor Subunit 2                | 0.519            | 0.0341  |
| MX2      | MX Dynamin Like GTPase 2                                    | 0.962            | 0.0392  |
| CXCR2    | C-X-C Motif Chemokine Receptor 2 (IL-8 receptor)            | 0.982            | 0.0404  |
| CASP5    | Cysteine-aspartic acid protease 5                           | 1.010            | 0.0441  |
| MX1      | MX Dynamin Like GTPase 1                                    | 1.620            | 0.0484  |

**Table S2, Relating to Figure 1.** Significantly down-regulated genes from the NanoString © Myeloid Innate Immunity panel.

| Gene ID | Gene description                                                 | Log2 fold change | p value |
|---------|------------------------------------------------------------------|------------------|---------|
| CD83    | Member of Ig superfamily                                         | -1.850           | 0.0069  |
| NFKBIZ  | NF-kappa-B inhibitor zeta                                        | -1.400           | 0.0080  |
| OSM     | Oncostatin M                                                     | -1.850           | 0.0080  |
| IL1A    | Interleukin-1 alpha                                              | -5.420           | 0.0080  |
| ATF3    | Activating transcription factor 3                                | -2.150           | 0.0096  |
| PTGS2   | Prostaglandin-endoperoxide synthase 2 (COX-2)                    | -1.220           | 0.0096  |
| GPR183  | G Protein-Coupled Receptor 183                                   | -2.500           | 0.0106  |
| TNF     | Tumour necrosis factor                                           | -1.790           | 0.0106  |
| ADORA2A | Adenosine A2A receptor                                           | -1.230           | 0.0106  |
| CCL20   | Macrophage Inflammatory Protein-3                                | -4.930           | 0.0106  |
| FOSL1   | Fos-related antigen 1                                            | -2.440           | 0.0106  |
| ICAM1   | Intercellular Adhesion Molecule 1                                | -0.937           | 0.0111  |
| IL1B    | Interleukin-1 beta                                               | -3.610           | 0.0114  |
| NFKBIA  | NF-kappa-B inhibitor alpha                                       | -1.860           | 0.0120  |
| VEGFA   | Vascular endothelial growth factor A                             | -1.350           | 0.0127  |
| IER3    | Immediate Early Response 3                                       | -1.730           | 0.0133  |
| PTX3    | Pentraxin-related protein                                        | -2.070           | 0.0133  |
| PLAUR   | Plasminogen activator, urokinase receptor                        | -1.120           | 0.0221  |
| MAFF    | MAF Basic Leucine Zipper Transcription Factor F                  | -3.000           | 0.0221  |
| CCRL2   | C-C chemokine receptor-like 2                                    | -0.914           | 0.0221  |
| NAMPT   | Nicotinamide phosphoribosyltransferase                           | -1.150           | 0.0221  |
| NLRP3   | NLR Family Pyrin Domain Containing 3                             | -1.000           | 0.0235  |
| CXCL8   | Interleukin 8                                                    | -1.590           | 0.0239  |
| TNFAIP3 | Tumor necrosis factor, alpha-induced protein 3                   | -1.730           | 0.0259  |
| NR4A2   | Nuclear receptor 4A2                                             | -2.450           | 0.0259  |
| CD99    | Single-chain type-1 glycoprotein                                 | -0.775           | 0.0259  |
| FEM1C   | Fem-1 Homolog C                                                  | -0.643           | 0.0259  |
| NFKBIE  | NF-kappa-B inhibitor epsilon                                     | -0.834           | 0.0260  |
| CSAR1   | Complement C5a Receptor 1                                        | -0.627           | 0.0312  |
| DUSP2   | Dual Specificity Phosphatase 2                                   | -2.090           | 0.0325  |
| CXCL2   | C-X-C Motif Chemokine Ligand 2                                   | -1.820           | 0.0333  |
| CYTIP   | Cytohesin 1 Interacting Protein                                  | -0.647           | 0.0342  |
| EMP1    | Epithelial Membrane Protein 1                                    | -1.470           | 0.0359  |
| LIF     | Leukemia inhibitory factor/IL-6 class cytokine                   | -4.710           | 0.0367  |
| BCL6    | Transcription Repressor                                          | -0.670           | 0.0392  |
| CXCL3   | C-X-C Motif Chemokine Ligand 3                                   | -2.030           | 0.0441  |
| BCL2    | Outer mitochondrial membrane apoptosis regulator                 | -1.080           | 0.0457  |
| CDKN1A  | Cyclin-dependent kinase inhibitor 1A                             | -1.270           | 0.0471  |
| RIPK2   | Receptor-interacting protein of serine/threonine protein kinases | -1.130           | 0.0483  |
| CCL4    | C-C Motif Chemokine Ligand 4                                     | -3.380           | 0.0483  |

**Table S3, Relating to Figure 2.** Significantly up- and down-regulated genes from the NanoString © Metabolic Pathways panel.

|                      | Gene ID                         | Gene description                                         | Log2 fold change | p value |
|----------------------|---------------------------------|----------------------------------------------------------|------------------|---------|
| <b>Upregulated</b>   | IDH1                            | Isocitrate dehydrogenase 1                               | 0.614            | 0.0005  |
|                      | TLR7                            | Toll-like receptor 7                                     | 1.150            | 0.0020  |
|                      | STAT1                           | Signal transducer and activator of transcription 1       | 1.200            | 0.0034  |
|                      | IRF1                            | Interferon regulatory factor 1                           | 0.831            | 0.0044  |
|                      | PSME2                           | Proteasome activator complex subunit 2                   | 0.846            | 0.0051  |
|                      | ACSF3                           | Acyl-CoA synthetase family member 3                      | 0.537            | 0.0051  |
|                      | RIMKLB                          | Ribosomal Modification Protein RimK Like Family Member B | 0.962            | 0.0108  |
|                      | JAK2                            | Janus kinase 2                                           | 0.596            | 0.0108  |
|                      | PDCD1LG2                        | Programmed cell death 1 ligand 2                         | 2.080            | 0.0118  |
|                      | RBBP5                           | Retinoblastoma-binding protein 5                         | 0.503            | 0.0125  |
|                      | MYC                             | Myc                                                      | 0.830            | 0.0144  |
|                      | KMO                             | Kynurenine 3-monooxygenase                               | 0.611            | 0.0144  |
|                      | MSRB2                           | Methionine Sulfoxide Reductase B2                        | 0.567            | 0.0184  |
|                      | SLC6A12                         | Sodium- and chloride-dependent betaine transporter       | 0.842            | 0.0184  |
|                      | PNOC                            | Prepronociceptin                                         | 1.490            | 0.0188  |
|                      | SCD                             | Stearoyl-CoA desaturase                                  | 1.370            | 0.0233  |
|                      | SOS1                            | Ras and Rac guanine nucleotide exchange factor           | 0.509            | 0.0321  |
| TYMP                 | Thymidine phosphorylase         | 0.682                                                    | 0.0458           |         |
| MS4A4A               | Membrane Spanning 4-Domains A4A | 0.857                                                    | 0.0492           |         |
| <b>Downregulated</b> | FANCI                           | FA Complementation Group I                               | -0.574           | 0.0184  |
|                      | VEGFA                           | Vascular endothelial growth factor A                     | -1.080           | 0.0196  |
|                      | APOM                            | Apolipoprotein M                                         | -0.524           | 0.0470  |
|                      | PRR5                            | Proline Rich 5                                           | -0.937           | 0.0492  |
|                      | ADORA2A                         | Adenosine A2A receptor                                   | -0.870           | 0.0515  |
